# Supplementary material
Source: publisher figshare collection journal article supplement (https://acs.figshare.com/ndownloader/files/4485994)
Supplement: Supplementary file 1 [file 4485994]

## Supporting Information

**Figure S1** To illustrate the effect of the hydration force on the particle stability against the intense shear flow, we use our colloidal system as an example to have calculated the total interaction potential ( $U/k_B T$ ), which include the attractive van der Waals ( $U_a$ ), the long-range repulsive electrostatic ( $U_r$ ), and the short-range repulsive hydration ( $U_h$ ) potentials, as a function of the surface distance between two particles ( $h$ ), where  $U_a$  is expressed by the Lennard-Jones potential:

$$U_a = 4\varepsilon \left[ \left( \sigma / h \right)^{12} - \left( \sigma / h \right)^6 \right]$$

with  $\varepsilon = 4 \times 10^{-18}$  J and  $\sigma = 3 \times 10^{-10}$  m, so that it accounts also for the short-range Born repulsion. For  $U_r$ , we use the modified Hogg-Healy-Fuersteneau expression:

$$U_r = \frac{4\pi\varepsilon_r\varepsilon_o a^2 \psi^2}{r} \ln[1 + \exp(-\kappa h)]$$

where  $\varepsilon_r$  ( $=78.5$ ) is the relative dielectric constant of water,  $\varepsilon_o$  ( $=8.85 \times 10^{-12}$  C<sup>2</sup>/J/m) the permittivity of vacuum,  $\psi$  the surface potential, replaced by the zeta potential ( $=0.053$  V), and  $1/\kappa$  ( $=5 \times 10^{-9}$  m) the Debye length. For  $U_h$ , we apply the exponential form commonly used in the literature:

$$U_h = \pi a F_0 \delta^2 \exp(-h / \delta_0)$$

where  $F_0$  is the hydration force constant and  $\delta_0$  ( $=3 \times 10^{-10}$  m) is the characteristic decay length. The exponential form of  $U_h$  has been justified by both experiments and numerical simulations.<sup>1,2</sup> It is seen that the short-range repulsion increases sharply as the hydration force increases.

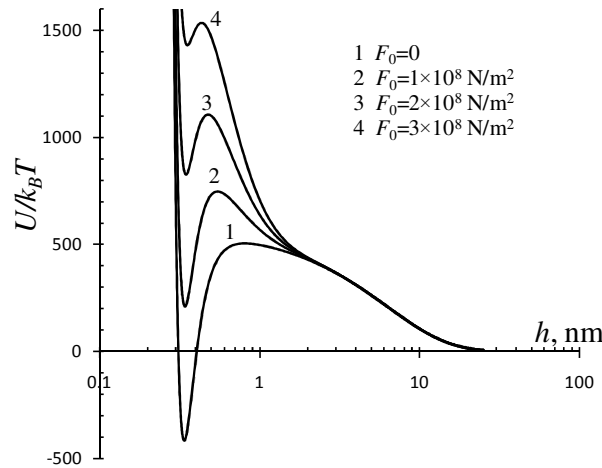

**Figure S2** The state of the latexes after passing through the z-MC at different temperatures and particle volume fractions. The broken line indicates at each temperature the transition from liquid-like to solid-like state as the particle volume fraction  $\phi$  increases.  $\Gamma=1.60\times 10^{-6}$  mol/m<sup>2</sup>.

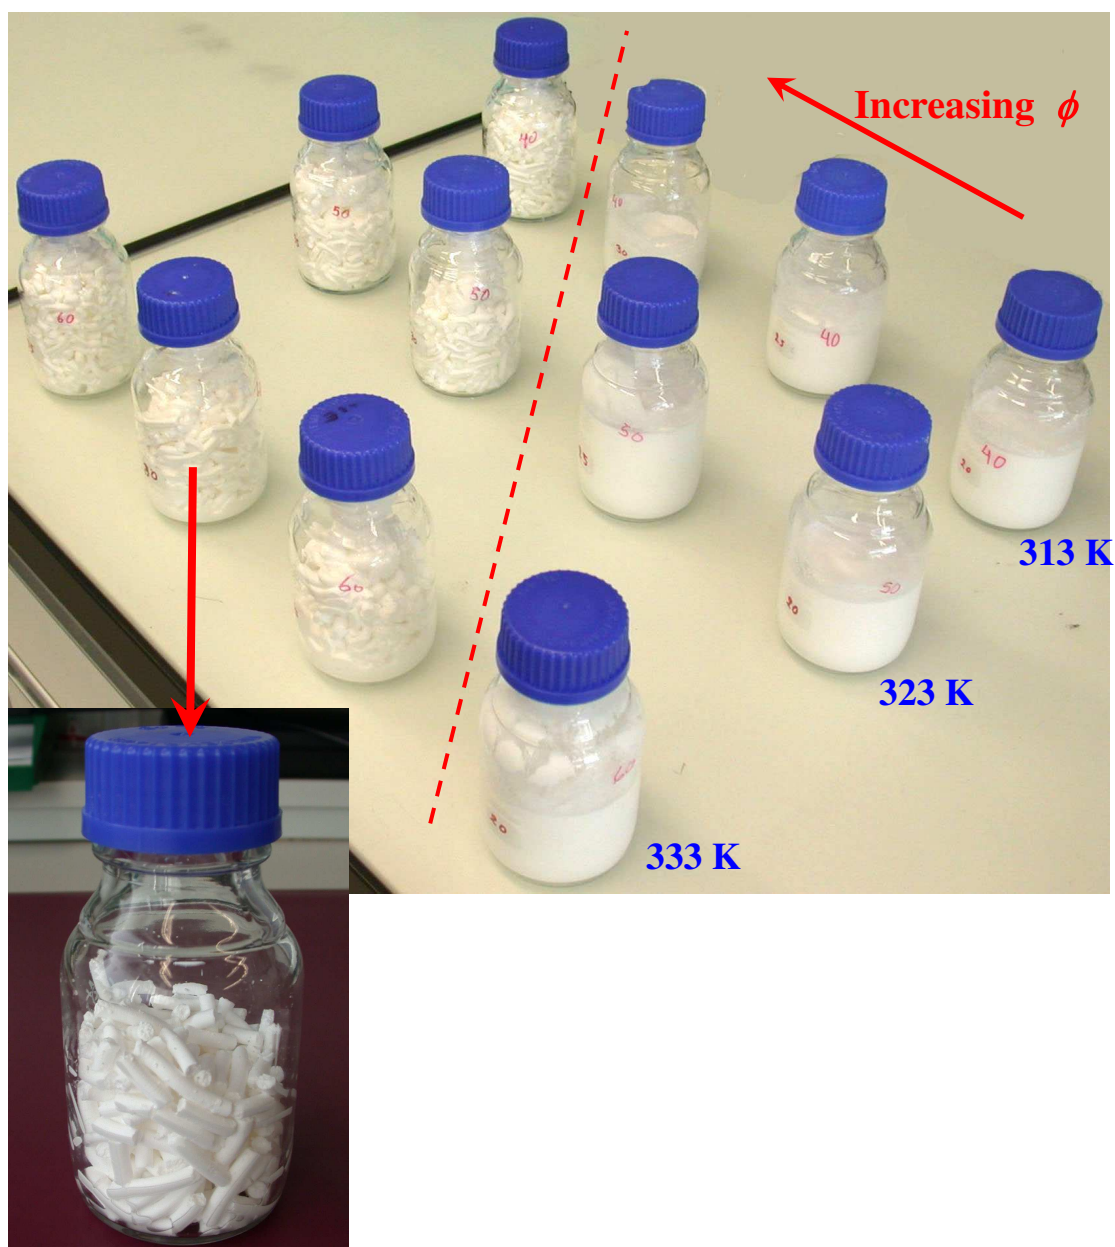

**Figure S3** Calibration curve to correlate the value of the measured turbidity  $\tau$  from the SALS to the particle volume fraction  $\phi$ .

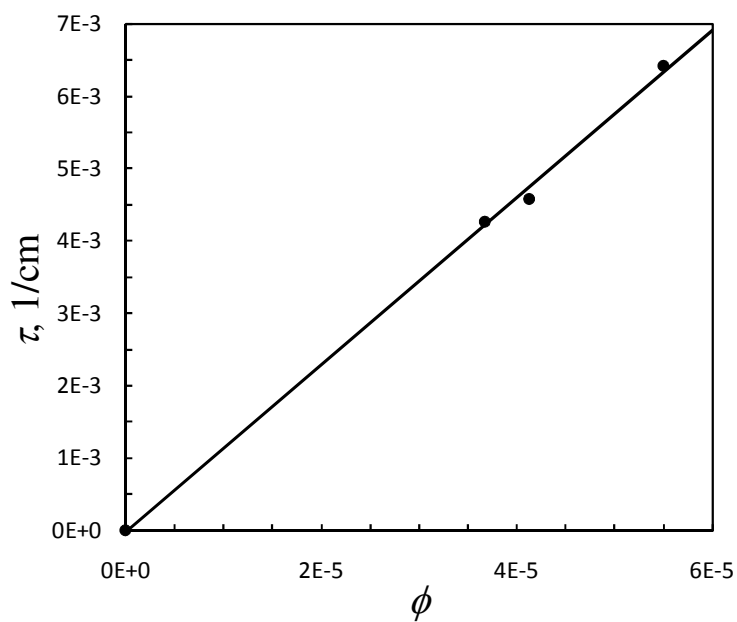

**Figure S4** The storage modulus of the gels  $G'$  generated in the z-MC as a function of the shear rate  $\dot{\gamma}_m$  used in the microchannel.  $\phi=0.264$ ;  $\Gamma=1.38 \times 10^{-6} \text{ mol/m}^2$ ;  $T=313 \text{ K}$ .

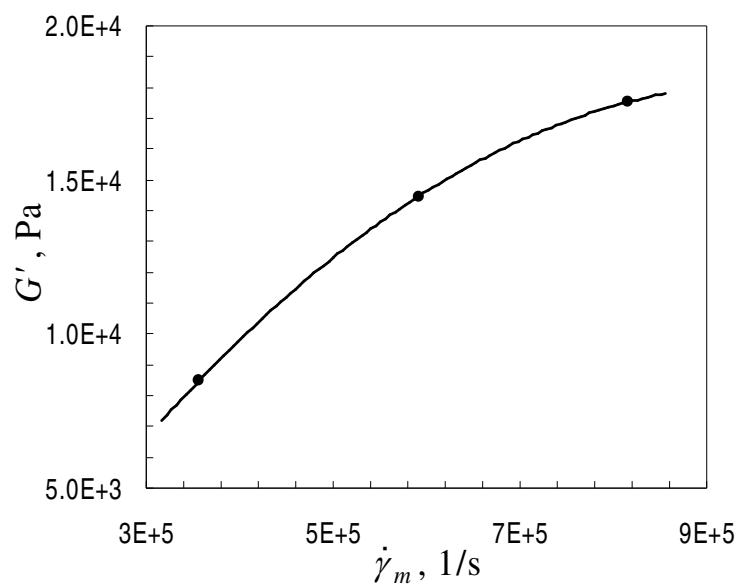

## References

- (1) Marcelja, S. *Nature* **1997**, 385, 689-690.
- (2) Raviv, U.; Klein, J. *Science* **2002**, 297, 1540-1543.
